# Supplementary material
Source: Springer Nature journal article supplement (https://www.springermedizin.de/resource/supplementary/13058_2013_3261_MOESM6_ESM.pdf/9703714)
Supplement: MOESM6 [file 9703714]

## IN VITRO

| TYPE OF MODEL                                                                                                        | ADVANTAGES                                                                                                                                                                                                                                                       | DISADVANTAGES                                                                                                                                                                                                    | IMPROVEMENTS                                                                                                                                                                       |
|----------------------------------------------------------------------------------------------------------------------|------------------------------------------------------------------------------------------------------------------------------------------------------------------------------------------------------------------------------------------------------------------|------------------------------------------------------------------------------------------------------------------------------------------------------------------------------------------------------------------|------------------------------------------------------------------------------------------------------------------------------------------------------------------------------------|
| 2D monolayer<br>                     | <ul style="list-style-type: none"> <li>Standardised format</li> <li>Widely used, simple</li> <li>Suitable for cell panels</li> <li>Suitable for proliferation, signalling pathways, genetic manipulation</li> </ul>                                              | <ul style="list-style-type: none"> <li>No ECM/stromal cells</li> <li>Non-physiological</li> <li>Static conditions</li> <li>High oxygen/nutrients</li> <li>Long-established lines</li> <li>Homogeneous</li> </ul> | <ul style="list-style-type: none"> <li>ECM substrates</li> <li>Host cell co-culture</li> <li>Flow conditions</li> <li>Hypoxic conditions</li> <li>Primary cell cultures</li> </ul> |
| 3D spheroid suspension or matrix<br> | <ul style="list-style-type: none"> <li>Multiple assay platforms</li> <li>ECM &amp;/or stromal cells</li> <li>Suitable for clonogenicity, migration, invasion etc</li> <li>Polarity &amp; architecture</li> <li>Nutrient &amp; O<sub>2</sub> gradients</li> </ul> | <ul style="list-style-type: none"> <li>More complex/ expensive</li> <li>Lower throughput</li> <li>Some assays require imaging capability</li> <li>Static conditions</li> </ul>                                   | <ul style="list-style-type: none"> <li>Tag cells for tracking in heterotypic cultures</li> <li>Host cell co-cultures</li> <li>CSC assays</li> <li>Primary cell cultures</li> </ul> |

## IN VIVO

|                                                                                                                     |                                                                                                                                                                                                                            |                                                                                                                                                                                                               |                                                                                                                                                                               |
|---------------------------------------------------------------------------------------------------------------------|----------------------------------------------------------------------------------------------------------------------------------------------------------------------------------------------------------------------------|---------------------------------------------------------------------------------------------------------------------------------------------------------------------------------------------------------------|-------------------------------------------------------------------------------------------------------------------------------------------------------------------------------|
| Human tumour xenotransplants<br>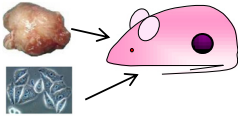    | <ul style="list-style-type: none"> <li>S.c is standard model</li> <li>Simple quantitation</li> <li>Tissue environment, blood supply, host cells</li> <li>Suitable for drug trials</li> </ul>                               | <ul style="list-style-type: none"> <li>Ectopic growth site</li> <li>No immune responses</li> <li>Mouse physiology</li> <li>Relatively expensive</li> <li>Cannot study cancer initiation/prevention</li> </ul> | <ul style="list-style-type: none"> <li>Orthotopic site (mfp)</li> <li>'Humanised' hosts</li> <li>Metastatic models</li> <li>Primary human cancer transplants (PDX)</li> </ul> |
| Genetically-modified mice (GEM)<br> | <ul style="list-style-type: none"> <li>Clinically-relevant genes</li> <li>Anatomically correct</li> <li>Natural development</li> <li>Immunocompetent host</li> <li>Can study initiation, prevention and therapy</li> </ul> | <ul style="list-style-type: none"> <li>Difficult/expensive to run</li> <li>Tumours sporadic/ slow</li> <li>Limited heterogeneity</li> <li>Mouse tumours and physiology</li> <li>Seldom metastasise</li> </ul> | <ul style="list-style-type: none"> <li>Primary transplants to increase reproducibility</li> <li>Additional mutations to increase malignancy</li> </ul>                        |
